# Supplementary material for: Identification of ROH Islands Conserved through Generations in Pigs Belonging to the Nero Lucano Breed
Source: MDPI journal article supplement (doi:10.3390/genes14071503), 2023-07-23
Supplement: s1 [file s1]

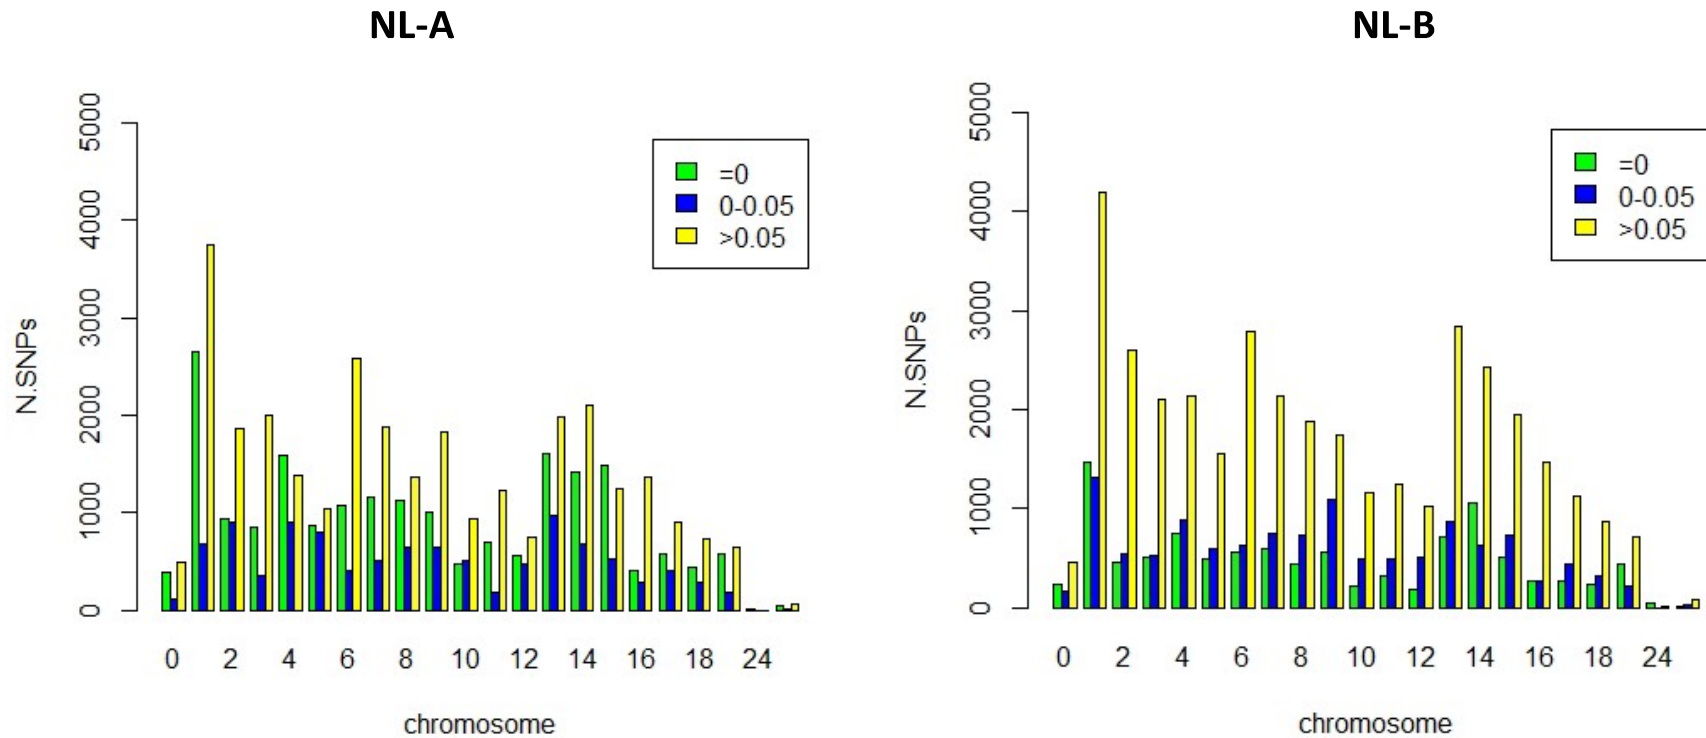

**Figure S1.** Chromosomal distribution according to the Minimum Allele Frequencies (MAF) of the SNPs in the two groups, NL-A and NL-B, of Nero Lucano pigs (0= non-defined chromosome position, 23=X chromosome, 24= Y chromosome, 25= XY  $\psi$ -autosomal region).

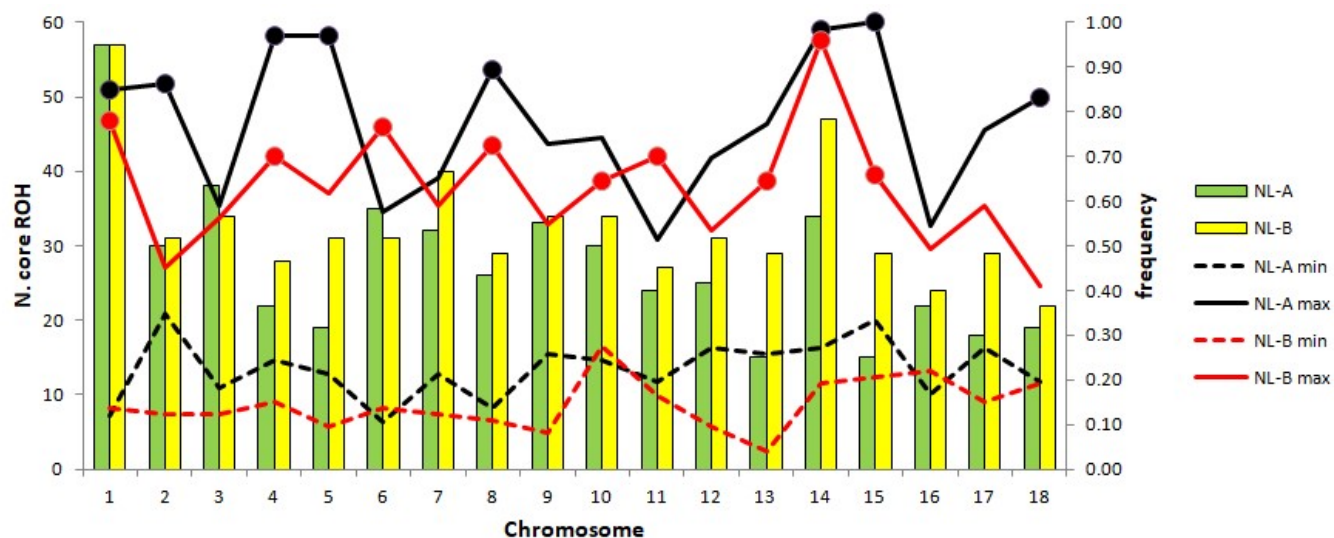

**Figure S2.** Chromosomal distribution of core ROH (bars), and minimum and maximum frequencies of core ROH (lines) in the two groups, NL-A and NL-B, of Nero Lucano pigs. Dots indicate ROH islands.

**Table S1.** Chromosomal distribution of the number of core ROH and ROH islands in the two groups, NL-A and NL-B, of Nero Lucano pigs.

| SSC  | NL-A     |        | NL-B     |        |
|------|----------|--------|----------|--------|
|      | Core ROH | ROHisl | Core ROH | ROHisl |
| 1    | 57       | 1      | 57       | 1      |
| 2    | 30       | 1      | 31       | -      |
| 3    | 38       | -      | 34       | -      |
| 4    | 22       | 6      | 28       | 6      |
| 5    | 19       | 3      | 31       | -      |
| 6    | 35       | -      | 31       | 1      |
| 7    | 32       | -      | 40       | -      |
| 8    | 26       | 1      | 29       | 4      |
| 9    | 33       | -      | 34       | -      |
| 10   | 30       | -      | 34       | 2      |
| 11   | 24       | -      | 27       | 2      |
| 12   | 25       | -      | 31       | -      |
| 13   | 15       | -      | 29       | 1      |
| 14   | 34       | 2      | 47       | 4      |
| 15   | 15       | 3      | 29       | 3      |
| 16   | 22       | -      | 24       | -      |
| 17   | 18       | -      | 29       | -      |
| 18   | 19       | 2      | 22       | -      |
| Tot. | 494      | 19     | 587      | 24     |

**Table S2.** Features of the ROH islands in the two groups, NL-A and NL-B, of Nero Lucano pigs (total overlaps are highlighted in yellow, partial overlaps are in red).

| NL-A  |           |           |       |      |
|-------|-----------|-----------|-------|------|
| SSC   | start     | end       | MB    | NSNP |
| 1     | 61286411  | 63123772  | 1.84  | 52   |
| 2     | 138165413 | 140762514 | 2.60  | 97   |
| 4     | 96094167  | 96682751  | 0.59  | 19   |
|       | 103876353 | 108603753 | 4.73  | 163  |
|       | 117536160 | 117687859 | 0.15  | 7    |
|       | 118823811 | 121019333 | 2.20  | 81   |
|       | 129082098 | 129135482 | 0.05  | 3    |
|       | 129180275 | 130871839 | 1.69  | 54   |
| 5     | 64278949  | 64500585  | 0.22  | 9    |
|       | 77860263  | 80009588  | 2.15  | 72   |
|       | 96525916  | 98941102  | 2.42  | 50   |
| 8     | 135852700 | 136018155 | 0.17  | 4    |
| 14    | 1953336   | 3036987   | 1.08  | 35   |
|       | 46176964  | 48062822  | 1.89  | 60   |
| 15    | 23234745  | 27699847  | 4.47  | 137  |
|       | 28586239  | 30855591  | 2.27  | 68   |
|       | 126097384 | 126642052 | 0.54  | 17   |
|       | 3021252   | 3772854   | 0.75  | 29   |
| 18    | 4207793   | 4353165   | 0.15  | 4    |
| Total |           |           | 29.94 | 961  |

| NL-B  |           |           |       |      |
|-------|-----------|-----------|-------|------|
| SSC   | start     | end       | MB    | NSNP |
| 1     | 61286411  | 63012075  | 1.73  | 47   |
| 4     | 57618121  | 57886604  | 0.27  | 8    |
|       | 96094167  | 96243742  | 0.15  | 8    |
|       | 97190659  | 97485594  | 0.29  | 14   |
|       | 99623881  | 100056015 | 0.43  | 16   |
|       | 102060871 | 103826709 | 1.77  | 68   |
|       | 114814756 | 116278694 | 1.46  | 36   |
| 6     | 129636266 | 131919402 | 2.28  | 64   |
| 8     | 21169328  | 21827236  | 0.66  | 17   |
|       | 22797483  | 24709455  | 1.91  | 33   |
|       | 133062402 | 135665981 | 2.60  | 87   |
|       | 135852700 | 136018155 | 0.17  | 4    |
| 10    | 61554922  | 61604324  | 0.05  | 3    |
|       | 62611588  | 63274310  | 0.66  | 32   |
| 11    | 3154821   | 4191013   | 1.04  | 25   |
|       | 39449593  | 39578555  | 0.13  | 7    |
| 13    | 3608413   | 3850825   | 0.24  | 7    |
| 14    | 8461080   | 9394510   | 0.93  | 26   |
|       | 10546428  | 10593029  | 0.05  | 3    |
|       | 46176964  | 47999414  | 1.82  | 58   |
|       | 124728188 | 125116457 | 0.39  | 16   |
| 15    | 17425392  | 18252281  | 0.83  | 24   |
|       | 123632778 | 126013489 | 2.38  | 72   |
|       | 126097384 | 126642052 | 0.54  | 17   |
| Total |           |           | 22.79 | 692  |

**Table S3.** Genes and QTLs mapped in the five ROH islands conserved between NL-A and NL-B pigs.

| ROH location                 | Gene acronym<br>or QTL ID | Gene name                                                | Gene/QTL position   |
|------------------------------|---------------------------|----------------------------------------------------------|---------------------|
| SSC1<br>61286411-63012075    | MANEA                     | Mannosidase Endo-Alpha                                   | 62887689-62945586   |
| SSC4<br>96094167-96243742    | S100A5                    | S100 Calcium Binding Protein A5                          | 96094167-96096870   |
|                              | S100A6                    | S100 Calcium Binding Protein A6                          | 96098264-96099686   |
|                              | S100A7                    | S100 Calcium Binding Protein A7                          | 96176718-96178694   |
|                              | S100A8                    | S100 Calcium Binding Protein A8                          | 96209670-96210603   |
|                              | S100A12                   | S100 Calcium Binding Protein A12                         | 96225691-96227030   |
|                              | S100A9                    | S100 Calcium Binding Protein A9                          | 96236114-96238989   |
|                              | PPGRP-S                   | Porcine Peptidoglycan Recognition Protein 1              | 96243174-96247517   |
| SSC8<br>135852700-136018155  | HNRNPD                    | Heterogeneous Nuclear Ribonucleoprotein D                | 135852700-135862633 |
|                              | RASGEF1B                  | RasGEF Domain Family Member 1B                           | 135896022-136018155 |
| SSC14<br>46176964-47999414   | ZNRF3                     | Zinc And Ring Finger 3                                   | 46176964-46241327   |
|                              | KREMEN1                   | Kringle Containing Transmembrane Protein 1               | 46254248-46323355   |
|                              | EMID1                     | EMI Domain Containing 1                                  | 46358013-46402078   |
|                              | RHBDD3                    | Rhomboid Domain Containing 3                             | 46403146-46411217   |
|                              | EWSR1                     | EWS RNA Binding Protein 1                                | 46408636-46439357   |
|                              | GAS2L1                    | Growth Arrest Specific 2 Like 1                          | 46449767-46455278   |
|                              | RASL10A                   | RAS Like Family 10 Member A                              | 46455441-46457977   |
|                              | APIB1                     | Adaptor Related Protein Complex 1 Subunit Beta 1         | 46469462-46520175   |
|                              | NEFH                      | Neurofilament Heavy Chain                                | 46559698-46568686   |
|                              | THOC5                     | THO Complex Subunit 5                                    | 46578973-46624237   |
|                              | NIPSNAP1                  | Nipsnap Homolog 1                                        | 46624368-46641453   |
|                              | NF2                       | NF2, Moesin-Ezrin-Radixin Like (MERLIN) Tumor Suppressor | 46653869-46726421   |
|                              | CABP7                     | Calcium Binding Protein 7                                | 46747654-46759312   |
|                              | ZMAT5                     | Zinc Finger Matrin-Type 5                                | 46758436-46783055   |
|                              | UQCR10                    | Ubiquinol-Cytochrome C Reductase, Complex III Subunit X  | 46783340-46786140   |
|                              | ASCC2                     | Activating Signal Cointegrator 1 Complex Subunit 2       | 46797307-46842479   |
|                              | MTMR3                     | Myotubularin Related Protein 3                           | 46874977-47022581   |
|                              | QTL #64660                |                                                          | 46888572            |
|                              | QTL #64771                |                                                          | 47005710            |
|                              | LIF                       | LIF Interleukin 6 Family Cytokine                        | 47221540-47239513   |
|                              | OSM                       | Oncostatin M                                             | 47242767-47246836   |
|                              | CASTOR1                   | Cytosolic Arginine Sensor For MTORC1 Subunit 1           | 47261905-47266729   |
|                              | TBC1D10A                  | TBC1 Domain Family Member 10A                            | 47269087-47301540   |
|                              | SF3A1                     | Splicing Factor 3a Subunit 1                             | 47312460-47335448   |
|                              | CCDC157                   | Coiled-Coil Domain Containing 157                        | 47335500-47351171   |
|                              | RNF215                    | Ring Finger Protein 215                                  | 47351296-47357191   |
|                              | SEC14L2                   | SEC14 Like Lipid Binding 2                               | 47369663-47391335   |
|                              | MTFP1                     | Mitochondrial Fission Process 1                          | 47392578-47396115   |
|                              | GAL3ST1                   | Galactose-3-O-Sulfotransferase 1                         | 47455089-47476459   |
|                              | PES1                      | Pescadillo Ribosomal Biogenesis Factor 1                 | 47478378-47495983   |
|                              | TCN2                      | Transcobalamin 2                                         | 47496245-47515966   |
|                              | SLC35E4                   | Solute Carrier Family 35 Member E4                       | 47518602-47550157   |
|                              | DUSP18                    | Dual Specificity Phosphatase 18                          | 47534152-47550953   |
|                              | OSBP2                     | Oxysterol Binding Protein 2                              | 47558088-47737994   |
|                              | MORC2                     | MORC Family CW-Type Zinc Finger 2                        | 47755264-47800432   |
|                              | QTL #126628               |                                                          | 47826895            |
|                              | SMTN                      | Smoothelin                                               | 47879317-47902700   |
|                              | QTL #173177               |                                                          | 47895001            |
|                              | SELENOM                   | Selenoprotein M                                          | 47902862-47905350   |
|                              | INPP5J                    | Inositol Polyphosphate-5-Phosphatase J                   | 47912921-47922632   |
|                              | PLA2G3                    | Phospholipase A2 Group III                               | 47923005-47928762   |
|                              | RNF185                    | Ring Finger Protein 185                                  | 47946370-47979702   |
|                              | QTL #37844                |                                                          | 47971494            |
|                              | LIMK2                     | LIM Domain Kinase 2                                      | 47983984-48039631   |
|                              | QTL #22109                |                                                          | 47999414            |
| SSC15<br>126097384-126642052 | FAM124B                   | Family With Sequence Similarity 124 Member B             | 126112445-126127658 |
|                              | CUL3                      | Cullin 3                                                 | 126191605-126287148 |
|                              | DOCK10                    | Dedicator Of Cytokinesis 10                              | 126435577-126642052 |

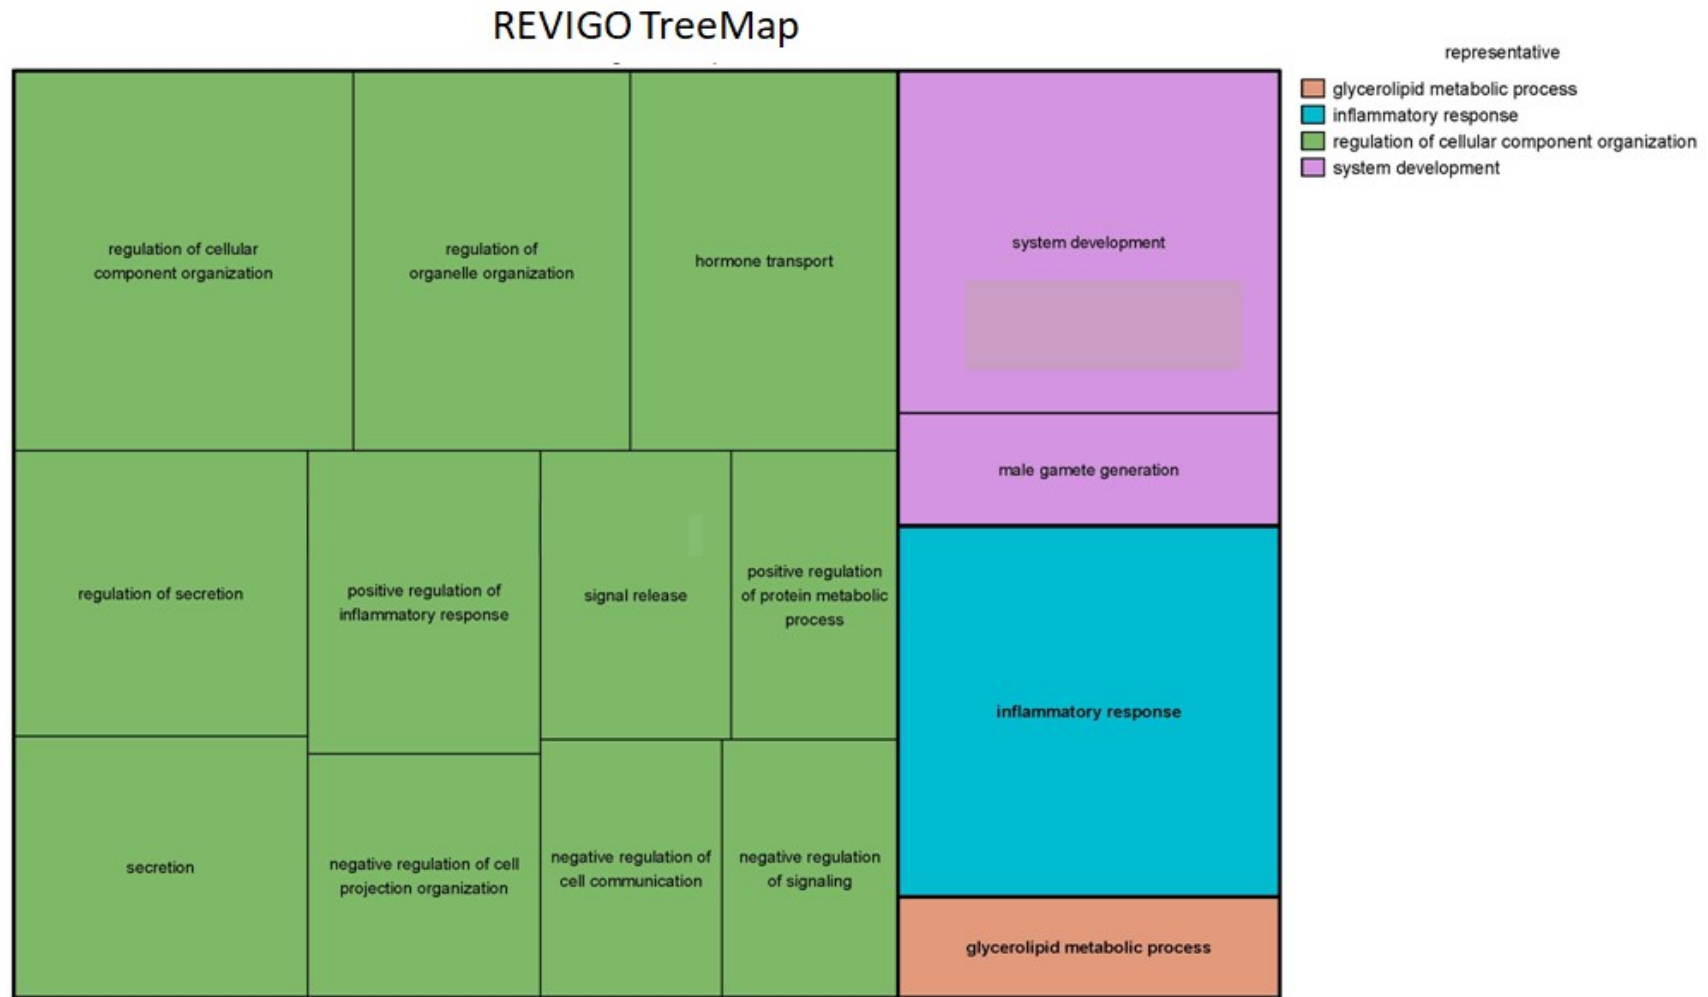

**Figure S3.** “Revigo Treemap” of Gene Ontology terms for genes located in the five ROH islands conserved between NL-A and NL-B pigs .

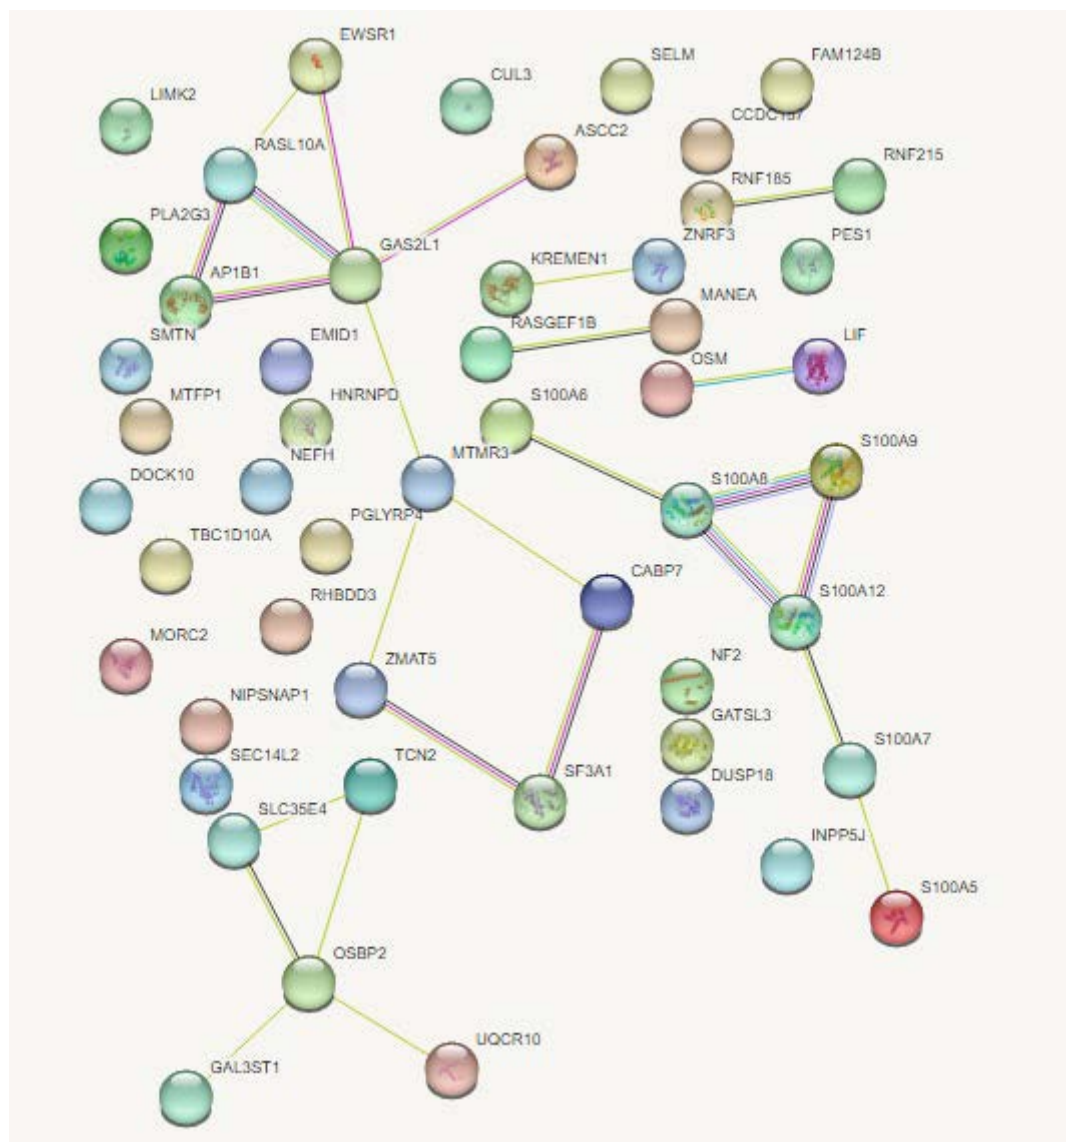

**Figure S4.** Network of protein–protein interaction (PPI) analysis carried out on genes located in the five ROH islands conserved between NL-A and NL-B pigs (nodes represent proteins).
